# Supplementary material
Source: publisher site journal article supplement (https://www.dovepress.com/article/509291)

Table S1. Comorbidities and Other medications during follow-up

| Varibilities                          | Patients<br>with<br>available<br>data, n | No chronic<br>myocardial<br>(n=62) | Chronic<br>myocardial<br>(n=20) | P-<br>value |
|---------------------------------------|------------------------------------------|------------------------------------|---------------------------------|-------------|
| Comorbidities                         |                                          |                                    |                                 |             |
| Hyperthyroidism                       | 82                                       | 1 (1.6)                            | 1 (5.0)                         | 0.984       |
| Hypothyroidism                        | 82                                       | 1 (1.6)                            | 1 (5.0)                         | 0.984       |
| Hyperlipidemia                        | 82                                       | 7 (11.3)                           | 1 (5.0)                         | 0.696       |
| Diabetes mellitus                     | 82                                       | 0 (0.0)                            | 2 (10.0)                        | 0.092       |
| Hypertension                          | 82                                       | 7 (11.3)                           | 1 (5.0)                         | 0.696       |
| Lung infections                       | 82                                       | 18 (29.0)                          | 3 (15.0)                        | 0.339       |
| III degree<br>Atrioventricular Block  | 82                                       | 4 (6.5)                            | 1 (5.0)                         | >0.999      |
| Complete right<br>bundle branch block | 82                                       | 2 (3.2)                            | 1 (5.0)                         | >0.999      |
| Anemia                                | 82                                       | 6 (9.7)                            | 0 (0.0)                         | 0.341       |
| Pleural effusion                      | 82                                       | 19 (30.6)                          | 3 (15.0)                        | 0.279       |
| Pericardial effusion                  | 82                                       | 15 (24.2)                          | 1 (5.0)                         | 0.119       |
| Viral hepatitis type<br>B/C           | 82                                       | 0 (0.0)                            | 3 (15.0)                        | 0.015       |
| Hepatic insufficiency                 | 82                                       | 26 (41.9)                          | 7 (35.0)                        | 0.774       |
| Renal insufficiency                   | 82                                       | 4 (6.5)                            | 1 (5.0)                         | >0.999      |
| Other medications<br>during follow-up |                                          |                                    |                                 |             |
| Coenzyme Q10                          | 82                                       | 53 (85.5)                          | 18 (90.0)                       | 0.89        |
| Trimetazidine                         | 82                                       | 56 (90.3)                          | 20 (100.0)                      | 0.341       |
| Thiamazole                            | 82                                       | 0 (0.0)                            | 1 (5.0)                         | 0.548       |

|                                  |    |           |          |        |
|----------------------------------|----|-----------|----------|--------|
| Levothyroxine sodium             | 82 | 0 (0.0)   | 1 (5.0)  | 0.548  |
| Reduced Glutathione              | 82 | 5 (8.1)   | 3 (15.0) | 0.634  |
| Statin                           | 82 | 2 (3.2)   | 0 (0.0)  | >0.999 |
| Ivabradine hydrochloride         | 82 | 5 (8.1)   | 0 (0.0)  | 0.439  |
| Diuretics                        | 82 | 8 (12.9)  | 3 (15.0) | >0.999 |
| Calcium Carbonate and Vitamin D3 | 82 | 18 (29.0) | 5 (25.0) | 0.95   |
| Iron Polysaccharide Complex      | 82 | 3 (4.8)   | 0 (0.0)  | 0.751  |
| Oral Antidiabetic Drug           | 82 | 0 (0.0)   | 1 (5.0)  | 0.548  |
| Antibiotics                      | 82 | 4 (6.5)   | 1 (5.0)  | >0.999 |
| Anti-HBV/HCV agents              | 82 | 0 (0.0)   | 3 (15.0) | 0.015  |

---

HBV, Hepatitis B; HCV, Hepatitis C.

Table S2. Baseline Characteristics of patients in the study (continued)

| Varibilities                      | Patients<br>with<br>availabl<br>e data, n | No chronic<br>myocardial<br><br>(n=62) | Chronic<br>myocardial<br><br>(n=20) | P-<br>value |
|-----------------------------------|-------------------------------------------|----------------------------------------|-------------------------------------|-------------|
| Symptoms                          |                                           |                                        |                                     |             |
| Chest Distress                    | 82                                        | 32 (51.6)                              | 5 (25.0)                            | 0.038       |
| Chest Pain                        | 82                                        | 12 (19.4)                              | 7 (35.0)                            | 0.255       |
| Palpitation                       | 82                                        | 11 (17.7)                              | 4 (20.0)                            | >0.999      |
| Syncope/Blackout                  | 82                                        | 10 (16.1)                              | 3 (15.0)                            | >0.999      |
| Fever                             | 82                                        | 25 (40.3)                              | 6 (30.0)                            | 0.408       |
| Shortness of Breath<br>or Dyspnea | 82                                        | 9 (14.5)                               | 7 (35.0)                            | 0.092       |
| Dizziness or<br>Headache          | 82                                        | 5 (8.1)                                | 1 (5.0)                             | >0.999      |
| Fatigue                           | 82                                        | 16 (25.8)                              | 4 (20.0)                            | 0.821       |
| Cough and Sputum                  | 82                                        | 1 (1.6)                                | 0 (0.0)                             | >0.999      |
| Abdominal Pain or<br>Diarrhea     | 82                                        | 11 (17.7)                              | 3 (15.0)                            | >0.999      |
| History                           |                                           |                                        |                                     |             |
| Smoking                           | 82                                        | 11 (17.7)                              | 2 (10.0)                            | 0.637       |
| Drinking                          | 82                                        | 1 (1.6)                                | 0 (0.0)                             | >0.999      |
| Examination for<br>diagnosis      |                                           |                                        |                                     |             |
| CMR                               | 82                                        | 59 (95.2)                              | 16 (80.0)                           | 0.099       |
| EMB                               | 82                                        | 37 (59.7)                              | 8 (40.0)                            | 0.124       |
| Laboratory<br>Examination         |                                           |                                        |                                     |             |

|                                |    |                            |        |                              |
|--------------------------------|----|----------------------------|--------|------------------------------|
| Lactic Acid, mmol/L            | 58 | 2.30 (1.49, 3.81)          | 2.32   | (1.67, 0.46<br>5.24)         |
| D-D Dimer, ug/mL               | 82 | 1.80 (0.95, 4.07)          | 1.46   | (0.50, 0.362<br>4.14)        |
| APTT, s                        | 79 | 43.10 (36.80,<br>70.10)    | 41.40  | (38.75, 0.944<br>76.75)      |
| PT, s                          | 79 | 14.40 (13.50,<br>15.80)    | 15.00  | (14.05, 0.335<br>16.00)      |
| Hemoglobin, g/L                | 82 | 125.00 (115.00,<br>134.00) | 120.00 | 0.589<br>(110.25,<br>135.25) |
| Platelets, *10 <sup>9</sup> /L | 82 | 185.00 (150.75,<br>236.75) | 163.50 | 0.261<br>(148.50,<br>209.00) |
| ALT, U/L                       | 82 | 53.00 (30.25,<br>113.25)   | 67.00  | (45.75, 0.128<br>246.75)     |
| AST, U/L                       | 82 | 115.00 (65.75,<br>232.50)  | 223.00 | 0.046<br>(129.75,<br>464.25) |
| Creatinine, umol/L             | 82 | 72.00 (61.00,<br>98.25)    | 75.00  | (59.25, 0.957<br>87.25)      |
| K, mmol/L                      | 82 | 4.03 (3.72, 4.27)          | 4.22   | (3.82, 0.315<br>4.53)        |

---

n, Patients with available data; CMR, Cardiac Magnetic Resonance; EMB, Endomyocardial Biopsy; APTT, Activated Partial Thromboplastin Time; PT, Prothrombin time; ALT, alanine aminotransferase; AST, aspartate aminotransferase; K, Serum Potassium.

Table S3. In-hospital management of the patients

| Management                           | n  | No chronic<br>myocardial<br>(n=62) | Chronic<br>myocardial<br>(n=20) | P-<br>value |
|--------------------------------------|----|------------------------------------|---------------------------------|-------------|
| Emergency Treatment                  |    |                                    |                                 |             |
| Invasive Mechanical<br>Ventilation   | 82 | 5 (8.2)                            | 2 (10.0)                        | >0.999      |
| Chest<br>Compressions/Defibrillation | 82 | 11 (18.0)                          | 3 (15.0)                        | >0.999      |
| Mechanical circulatory<br>support    |    |                                    |                                 |             |
| IABP                                 | 82 | 58 (93.5)                          | 19 (95.0)                       | >0.999      |
| ECMO                                 | 82 | 20 (32.3)                          | 5 (25.0)                        | 0.739       |
| External Temporary<br>Pacemaker      | 82 | 26 (41.9)                          | 6 (30.0)                        | 0.492       |
| CRRT                                 | 82 | 11 (17.7)                          | 3 (15.0)                        | >0.999      |
| Drug therapy                         |    |                                    |                                 |             |
| Inotropes                            | 82 | 33 (53.23)                         | 8 (40.0)                        | 0.222       |
| Antiviral Drugs                      | 82 | 76 (98.7)                          | 26 (96.3)                       | >0.999      |
| Immunosuppressive<br>therapy         |    |                                    |                                 |             |
| IVIG                                 | 82 | 59 (95.2)                          | 20 (100.0)                      | 0.751       |

|                       |    |                             |                             |        |
|-----------------------|----|-----------------------------|-----------------------------|--------|
| IVIG Dosage           | 82 | 50.00 (40.00,<br>80.00)     | 42.50 (33.75,<br>60.00)     | 0.357  |
| Glucocorticoid        | 82 | 62 (100.0)                  | 20 (100.0)                  | >0.999 |
| Glucocorticoid Dosage | 82 | 880.00 (610.00,<br>1395.00) | 840.00 (630.00,<br>1170.00) | 0.563  |

---

IABP, intra-aortic ballon pump; ECMO, extracorporeal membrane

oxygenation; CRRT, continuous renal replacement therapy; IVIG, intravenous

immunoglobulin.

Table S4. Association between Follow-up hs-cTnI & Follow-up LVEF

| follow-up | LVEF                    | follow-up hs-cTnI |         |         |          |          |
|-----------|-------------------------|-------------------|---------|---------|----------|----------|
|           |                         | 1 month           | 3 month | 6 month | 12 month | 24 month |
| 1 month   | correlation coefficient | -0.353**          | -0.255  | -0.321  | -0.043   | -0.232   |
|           | n                       | 64                | 34      | 32      | 31       | 10       |
| 3 month   | correlation coefficient | -0.236            | 0.084   | 0.030   | 0.381*   | -0.208   |
|           | n                       | 47                | 33      | 25      | 29       | 7        |
| 6 month   | correlation coefficient | -0.069            | -0.147  | 0.001   | -0.286   | -0.164   |
|           | n                       | 34                | 27      | 27      | 23       | 7        |
| 12 month  | correlation coefficient | 0.010             | 0.219   | 0.023   | -0.076   | 0.162    |
|           | n                       | 39                | 23      | 22      | 23       | 8        |
| 24 month  | correlation coefficient | 0.246             | -0.071  | -0.208  | -0.264   | 0.043    |
|           | n                       | 11                | 4       | 6       | 6        | 8        |

\* p<0.05; \*\* p<0.01

LVEF, Left ventricular ejection fraction; hs-cTnI, high-sensitive cardiac troponin I; n, Patients with available data; r, Person correlation coefficient

Table S5. Univariate analysis of factors associated with the occurrence of chronic persistent myocarditis

|                                   | Univariate Logistic |          | Univariate Cox      |          |
|-----------------------------------|---------------------|----------|---------------------|----------|
|                                   | 95.0% CI            | <i>p</i> | 95.0% CI            | <i>p</i> |
| Age                               | 1.02 (0.98-1.05)    | 0.296    | 1.02 (0.986-1.05)   | 0.308    |
| Sex(male)                         | 1.21 (0.44-3.35)    | 0.712    | 1.19 (0.495-2.88)   | 0.693    |
| Time from onset to admission >6d  | 3.63 (1.12-11.84)   | 0.032    | 2.81 (1.12-7.06)    | 0.028    |
| Hospitalization Time              | 0.98 (0.90-1.07)    | 0.679    | 0.976 (0.9-1.06)    | 0.553    |
| Smoking History                   | 0.52 (0.10-2.55)    | 0.416    | 0.563 (0.131-2.43)  | 0.441    |
| Drinking History                  | 0.00 (0.00-Inf)     | 0.992    | 0.00 (0.00-Inf)     | 0.998    |
| Systolic Blood Pressure           | 1.01 (0.98-1.05)    | 0.434    | 1.01 (0.984-1.04)   | 0.455    |
| Diastolic Blood Pressure          | 1.00 (0.96-1.04)    | 0.900    | 1.00 (0.965-1.04)   | 0.993    |
| CMR                               | 0.20 (0.04-1.00)    | 0.050    | 0.255 (0.0841-0.77) | 0.015    |
| Coronary Angiography              | 1.02 (0.36-2.94)    | 0.969    | 1.00 (0.398-2.52)   | 0.997    |
| EMB                               | 0.45 (0.16-1.26)    | 0.129    | 0.509 (0.207-1.25)  | 0.142    |
| ST-T Changes                      | 1.77 (0.57-5.51)    | 0.325    | 1.63 (0.59-4.5)     | 0.347    |
| Invasive Mechanical Ventilation   | 1.04 (0.19-5.60)    | 0.966    | 0.938 (0.214-4.11)  | 0.932    |
| Chest Compressions/Defibrillation |                     |          |                     |          |
| IABP                              | 1.31 (0.14-12.45)   | 0.814    | 1.28 (0.17-9.61)    | 0.812    |
| IABP Time                         | 0.96 (0.83-1.12)    | 0.609    | 0.97 (0.85-1.11)    | 0.647    |
| ECMO                              | 0.70 (0.22-2.20)    | 0.541    | 0.652 (0.236-1.8)   | 0.409    |
| ECMO Time                         | 0.95 (0.80-1.13)    | 0.566    | 0.951 (0.812-1.11)  | 0.536    |
| External Temporary Pacemaker      | 0.59 (0.20-1.75)    | 0.344    | 0.609 (0.234-1.58)  | 0.309    |
| External Temporary Pacemaker Time | 0.89 (0.74-1.08)    | 0.244    | 0.904 (0.76-1.08)   | 0.255    |

|                       |                   |       |                    |       |
|-----------------------|-------------------|-------|--------------------|-------|
| CRRT                  | 0.82 (0.20-3.28)  | 0.777 | 0.811 (0.238-2.77) | 0.738 |
| CRRT Time             | 1.01 (0.99-1.02)  | 0.284 | 1.01 (0.999-1.01)  | 0.074 |
| Inotropes             | 0.59 (0.21-1.63)  | 0.306 | 0.59 (0.239-1.45)  | 0.251 |
| Immunoglobulin Dosage | 0.99 (0.97-1.01)  | 0.373 | 0.992 (0.977-1.01) | 0.337 |
| Glucocorticoid Dosage | 1.00 (1.00-1.00)  | 0.512 | 1.00 (0.999-1.00)  | 0.514 |
| ACEI/ARB              | 3.12 (0.82-11.82) | 0.095 | 2.48 (0.725-8.48)  | 0.148 |
| $\beta$ Blocker       | 0.95 (0.33-2.74)  | 0.926 | 0.906 (0.36-2.28)  | 0.833 |
| LVEF At Admission     | 0.97 (0.93-1.01)  | 0.116 | 0.974 (0.939-1.01) | 0.142 |
| Lowest LVEF           | 1.00 (0.96-1.03)  | 0.842 | 1.00 (0.97-1.03)   | 0.995 |
| hs-cTnI               | 1.00 (1.00-1.00)  | 0.018 | 1.00 (1.00-1.00)   | 0.020 |
| elevated CK/CK-MB     | 1.36 (0.26-7.15)  | 0.714 | 1.29 (0.295-5.64)  | 0.736 |
| NT-proBNP             | 1.00 (1.00-1.00)  | 0.025 | 1.00 (1.00-1.00)   | 0.009 |
| Lactic Acid           | 1.17 (0.86-1.58)  | 0.316 | 1.13 (0.862-1.49)  | 0.368 |
| D-D Dimer             | 1.00 (1.00-1.00)  | 0.793 | 1.00 (0.999-1.00)  | 0.901 |
| APTT                  | 1.00 (0.99-1.02)  | 0.948 | 1.00(0.987-1.01)   | 0.986 |
| PT                    | 0.99 (0.90-1.07)  | 0.733 | 0.99 (0.919-1.07)  | 0.780 |
| WBC                   | 1.06 (0.97-1.15)  | 0.207 | 1.05 (0.998-1.1)   | 0.061 |
| Neutrophil            | 1.06 (0.97-1.15)  | 0.227 | 1.05 (0.993-1.11)  | 0.085 |
| Lymphocyte            | 0.92 (0.63-1.34)  | 0.651 | 0.937 (0.682-1.29) | 0.690 |
| Hemoglobin            | 1.00 (0.97-1.02)  | 0.773 | 0.998 (0.974-1.02) | 0.842 |
| Platelets             | 1.00 (0.99-1.00)  | 0.250 | 0.997 (0.991-1.00) | 0.319 |
| ALT                   | 1.00 (1.00-1.00)  | 0.386 | 1.00 (1.00-1.00)   | 0.367 |
| AST                   | 1.00 (1.00-1.00)  | 0.329 | 1.00 (1.00-1.00)   | 0.286 |
| Creatinine            | 1.00 (0.99-1.01)  | 0.416 | 1.00 (0.996-1.01)  | 0.345 |
| LDH                   | 1.00 (1.00-1.00)  | 0.024 | 1.00 (1.00-1.00)   | 0.013 |
| K                     | 1.54 (0.61-3.89)  | 0.359 | 1.53 (0.69-3.41)   | 0.294 |
| hs-CRP                | 1.00 (0.99-1.01)  | 0.898 | 1.00 (0.994-1.01)  | 0.981 |
| ESR                   | 1.00 (0.97-1.03)  | 0.820 | 1.00 (0.977-1.03)  | 0.876 |
| IL-1 $\beta$          | 1.05 (0.96-1.14)  | 0.265 | 1.02 (1.01-1.04)   | 0.007 |

|               |                  |       |                    |       |
|---------------|------------------|-------|--------------------|-------|
| IL-2R         | 1.00 (1.00-1.00) | 0.839 | 1.00 (0.999-1.00)  | 0.844 |
| IL-6          | 1.01 (1.00-1.03) | 0.033 | 1.01 (1.00-1.01)   | 0.028 |
| IL-8          | 1.00 (1.00-1.00) | 0.108 | 1.00 (1.00-1.00)   | 0.015 |
| IL-10         | 1.00 (0.98-1.03) | 0.749 | 1.00 (0.984-1.02)  | 0.751 |
| TNF- $\alpha$ | 1.02 (0.99-1.05) | 0.129 | 1.01 (0.996-1.03)  | 0.138 |
| PCT           | 0.99 (0.92-1.07) | 0.773 | 0.987 (0.917-1.06) | 0.736 |

n, Patients with available data; SBP, Systolic Blood Pressure; DSP, Diastolic Blood Pressure; LVEF, left ventricular ejection fraction; IABP, intra-aortic balloon pump; ECMO, extracorporeal membrane oxygenation; CRRT, continuous renal replacement therapy; hs-cTnI, high-sensitive cardiac troponin I; NT-proBNP, N-terminal pro-B-type natriuretic peptide; LDH, lactate dehydrogenase; CK-MB, Creatine Kinase MB isoenzyme; CK, Creatine Kinase; hs-CRP, high-sensitive C-reactive protein; ESR, Erythrocyte Sedimentation Rate; CMR, Cardiac Magnetic Resonance; EMB, Endomyocardial Biopsy; APTT, Activated Partial Thromboplastin Time; PT, Prothrombin time; ALT, alanine aminotransferase; AST, aspartate aminotransferase; K, Serum Potassium; PCT, Procalcitonin.

## Supplementary Figure Legends

Figure S1. Flow chat of the study.

Figure S2. Representative change in follow-up hs-cTnI and follow-up LVEF in chronic myocarditis persistent patient (a) and recovered patient (b).

304 patients clinically diagnosed as acute myocarditis between February 2017 and June 2023 from Tongji Hospital and Minda Hospital of Hubei Minzu University

165 non fulminant myocarditis patients excluded

- No distinct heart failure symptoms
- No haemodynamic compromise requiring inotropes and/or mechanical circulatory support
- Not confirmed by EMB or CMR

139 patients clinically diagnosed as fulminant myocarditis

49 patients meet the exclusion criteria excluded

- Dead in hospital or HTx
- Refusal of follow-up
- History of ischemic cardiomyopathy, myocarditis, cardiomyopathy, malignant tumor/cancer and other diseases that affect cardiac function and prognosis
- Time from onset to admission > 30d
- Children (< 15 years old)

8 patients lack of follow-up data excluded

82 met the final criteria for the study

**a**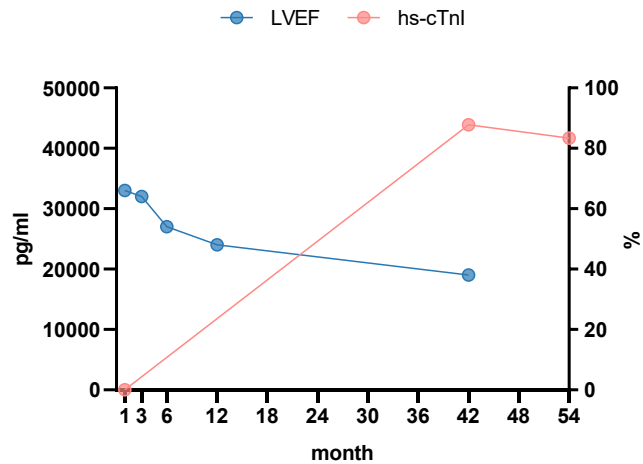**b**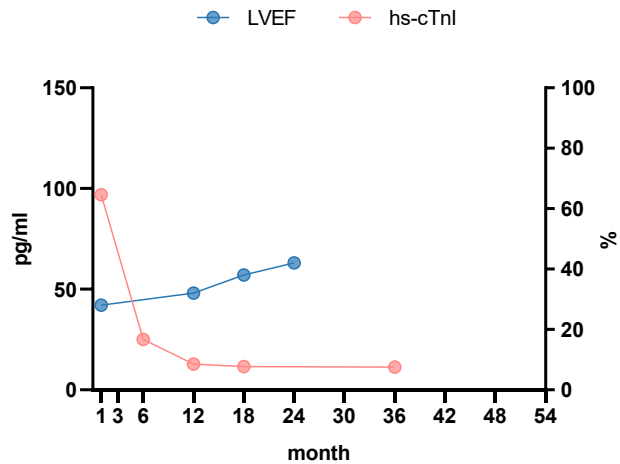

Supplement: Supplementary file 1 [file get_supplementary_file.php]
